# Supplementary material
Source: Research Square preprint supplement (doi:10.21203/rs.3.rs-9239998/v1)
Supplement: Supplementary file 1 [file 1d65f08654bc35e40658a5f8.docx]

**Multimodal Feature Fusion for Molecular Property Classification**

Jing Liu1, #, Yin Wang1, #, Li Xue2, Qiaorong Wu1, Wenwei Tao1, Yiwei Wang3,*, Jianming Wu 3, *, Jiesi Luo3, *

1 Institute of Cardiovascular Medicine Research, Southwest Medical University, Luzhou, 646000, Sichuan, China

2 School of Public Health, Southwest Medical University, Luzhou, 646000, China

3 Basic Medical Science, Southwest Medical University, Luzhou 646000, Sichuan, China

* Corresponding author.

E-mail address: ljs@swmu.edu.cn (J. Luo)

jianmingwu@swmu.edu.cn (J. Wu)

wangyiwei0102@swmu.edu.cn (Y. Wang)

# These authors contributed equally.

**
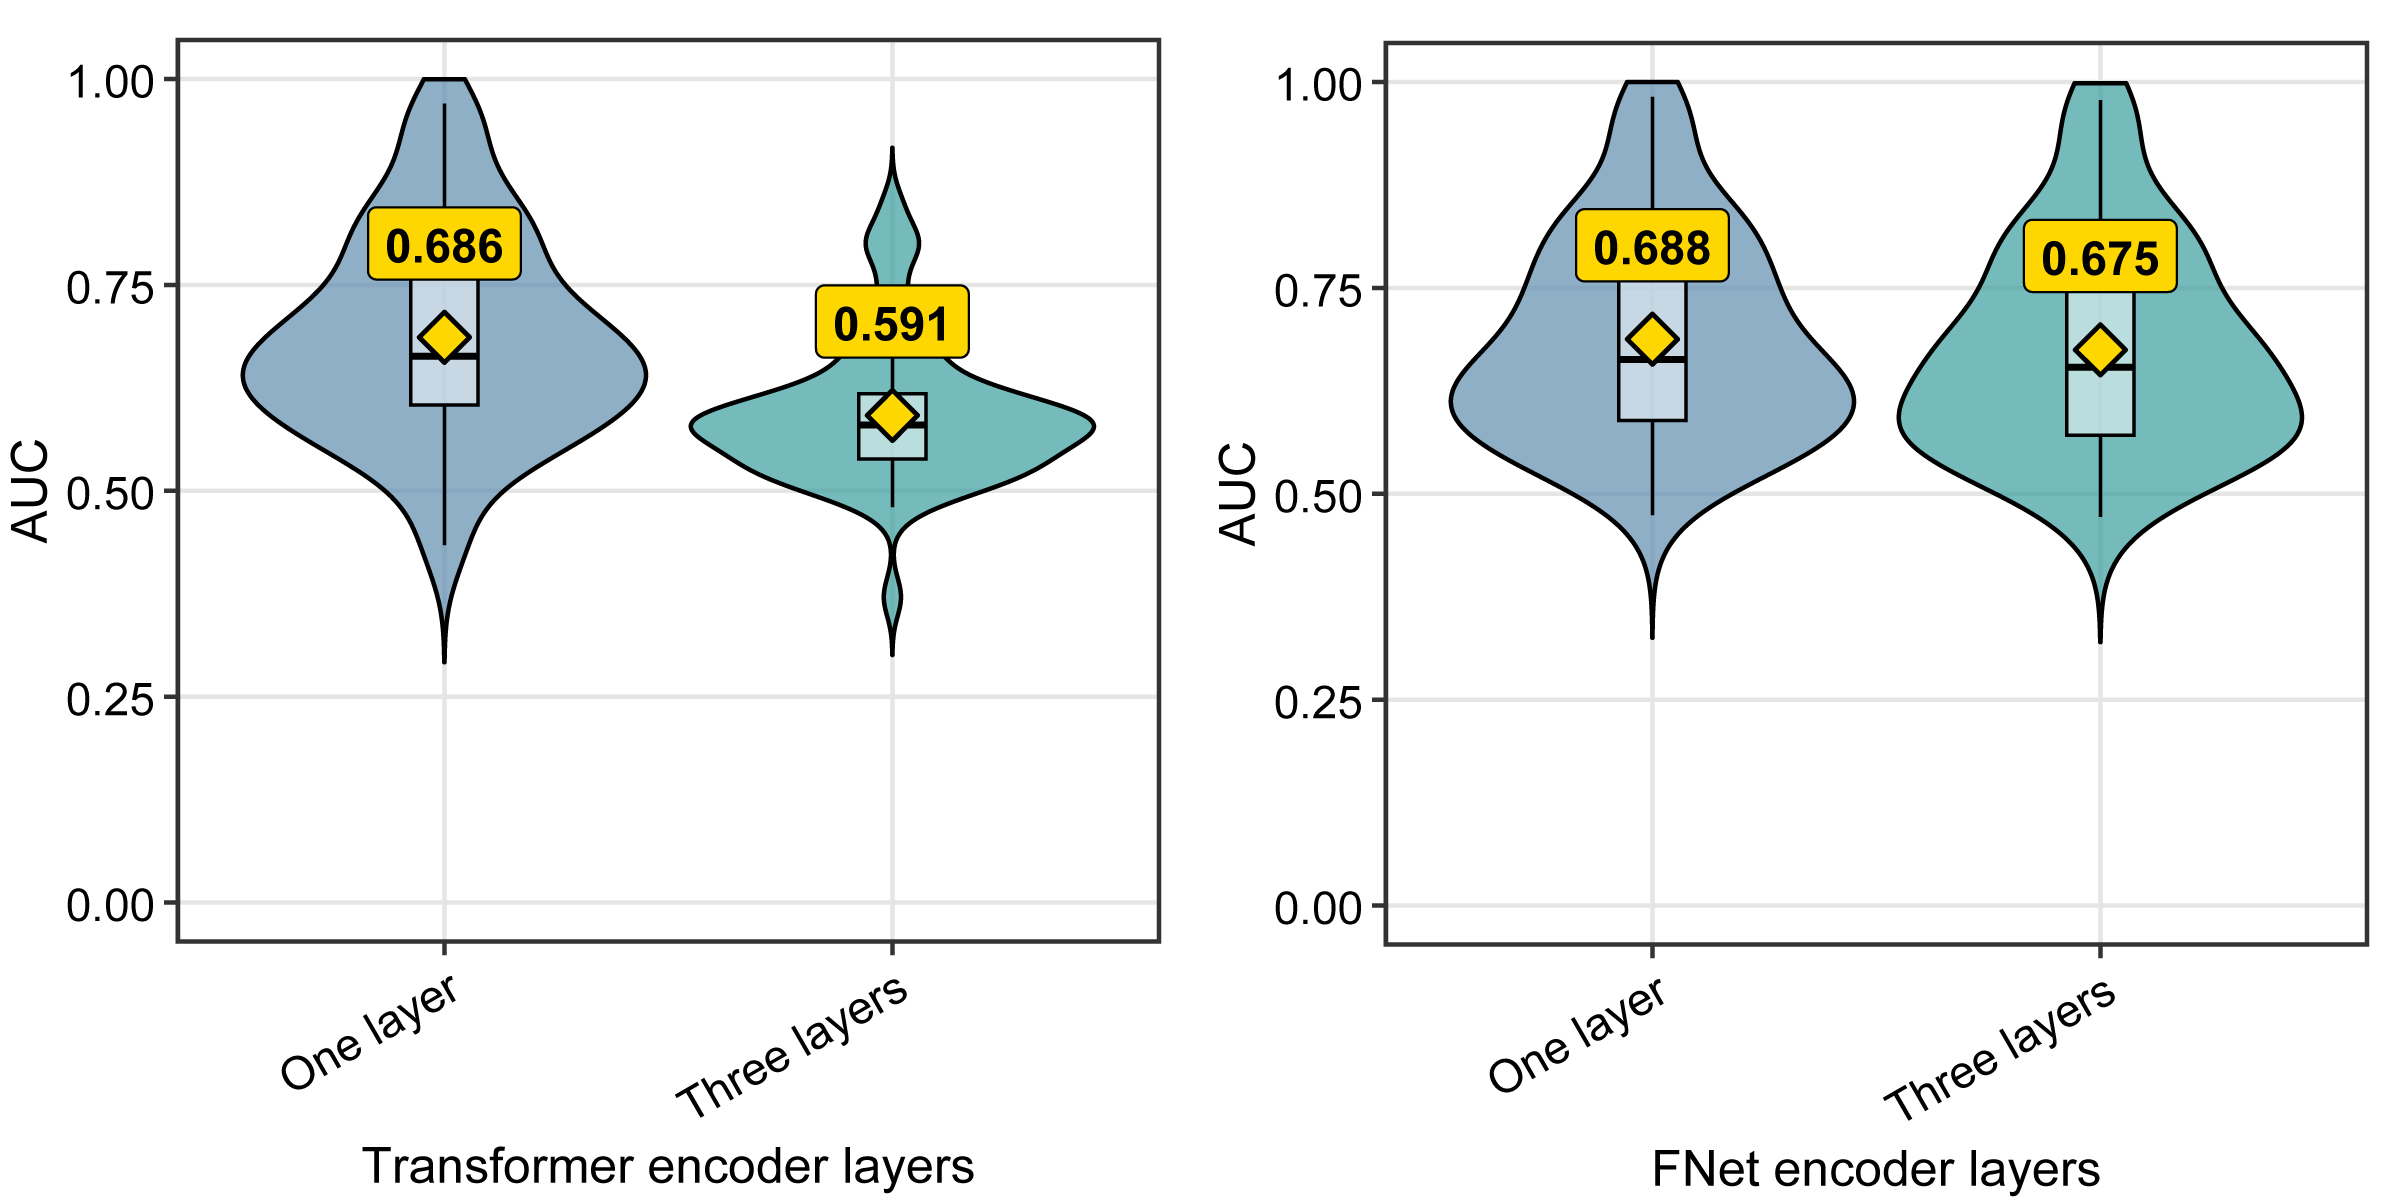
**

**Figure S1.** Comparison of prediction performance among Transformer and FNet architectures with different model depths. Each configuration was evaluated with one and three stacked Transformer layers to assess the effect of network depth on predictive accuracy.

**
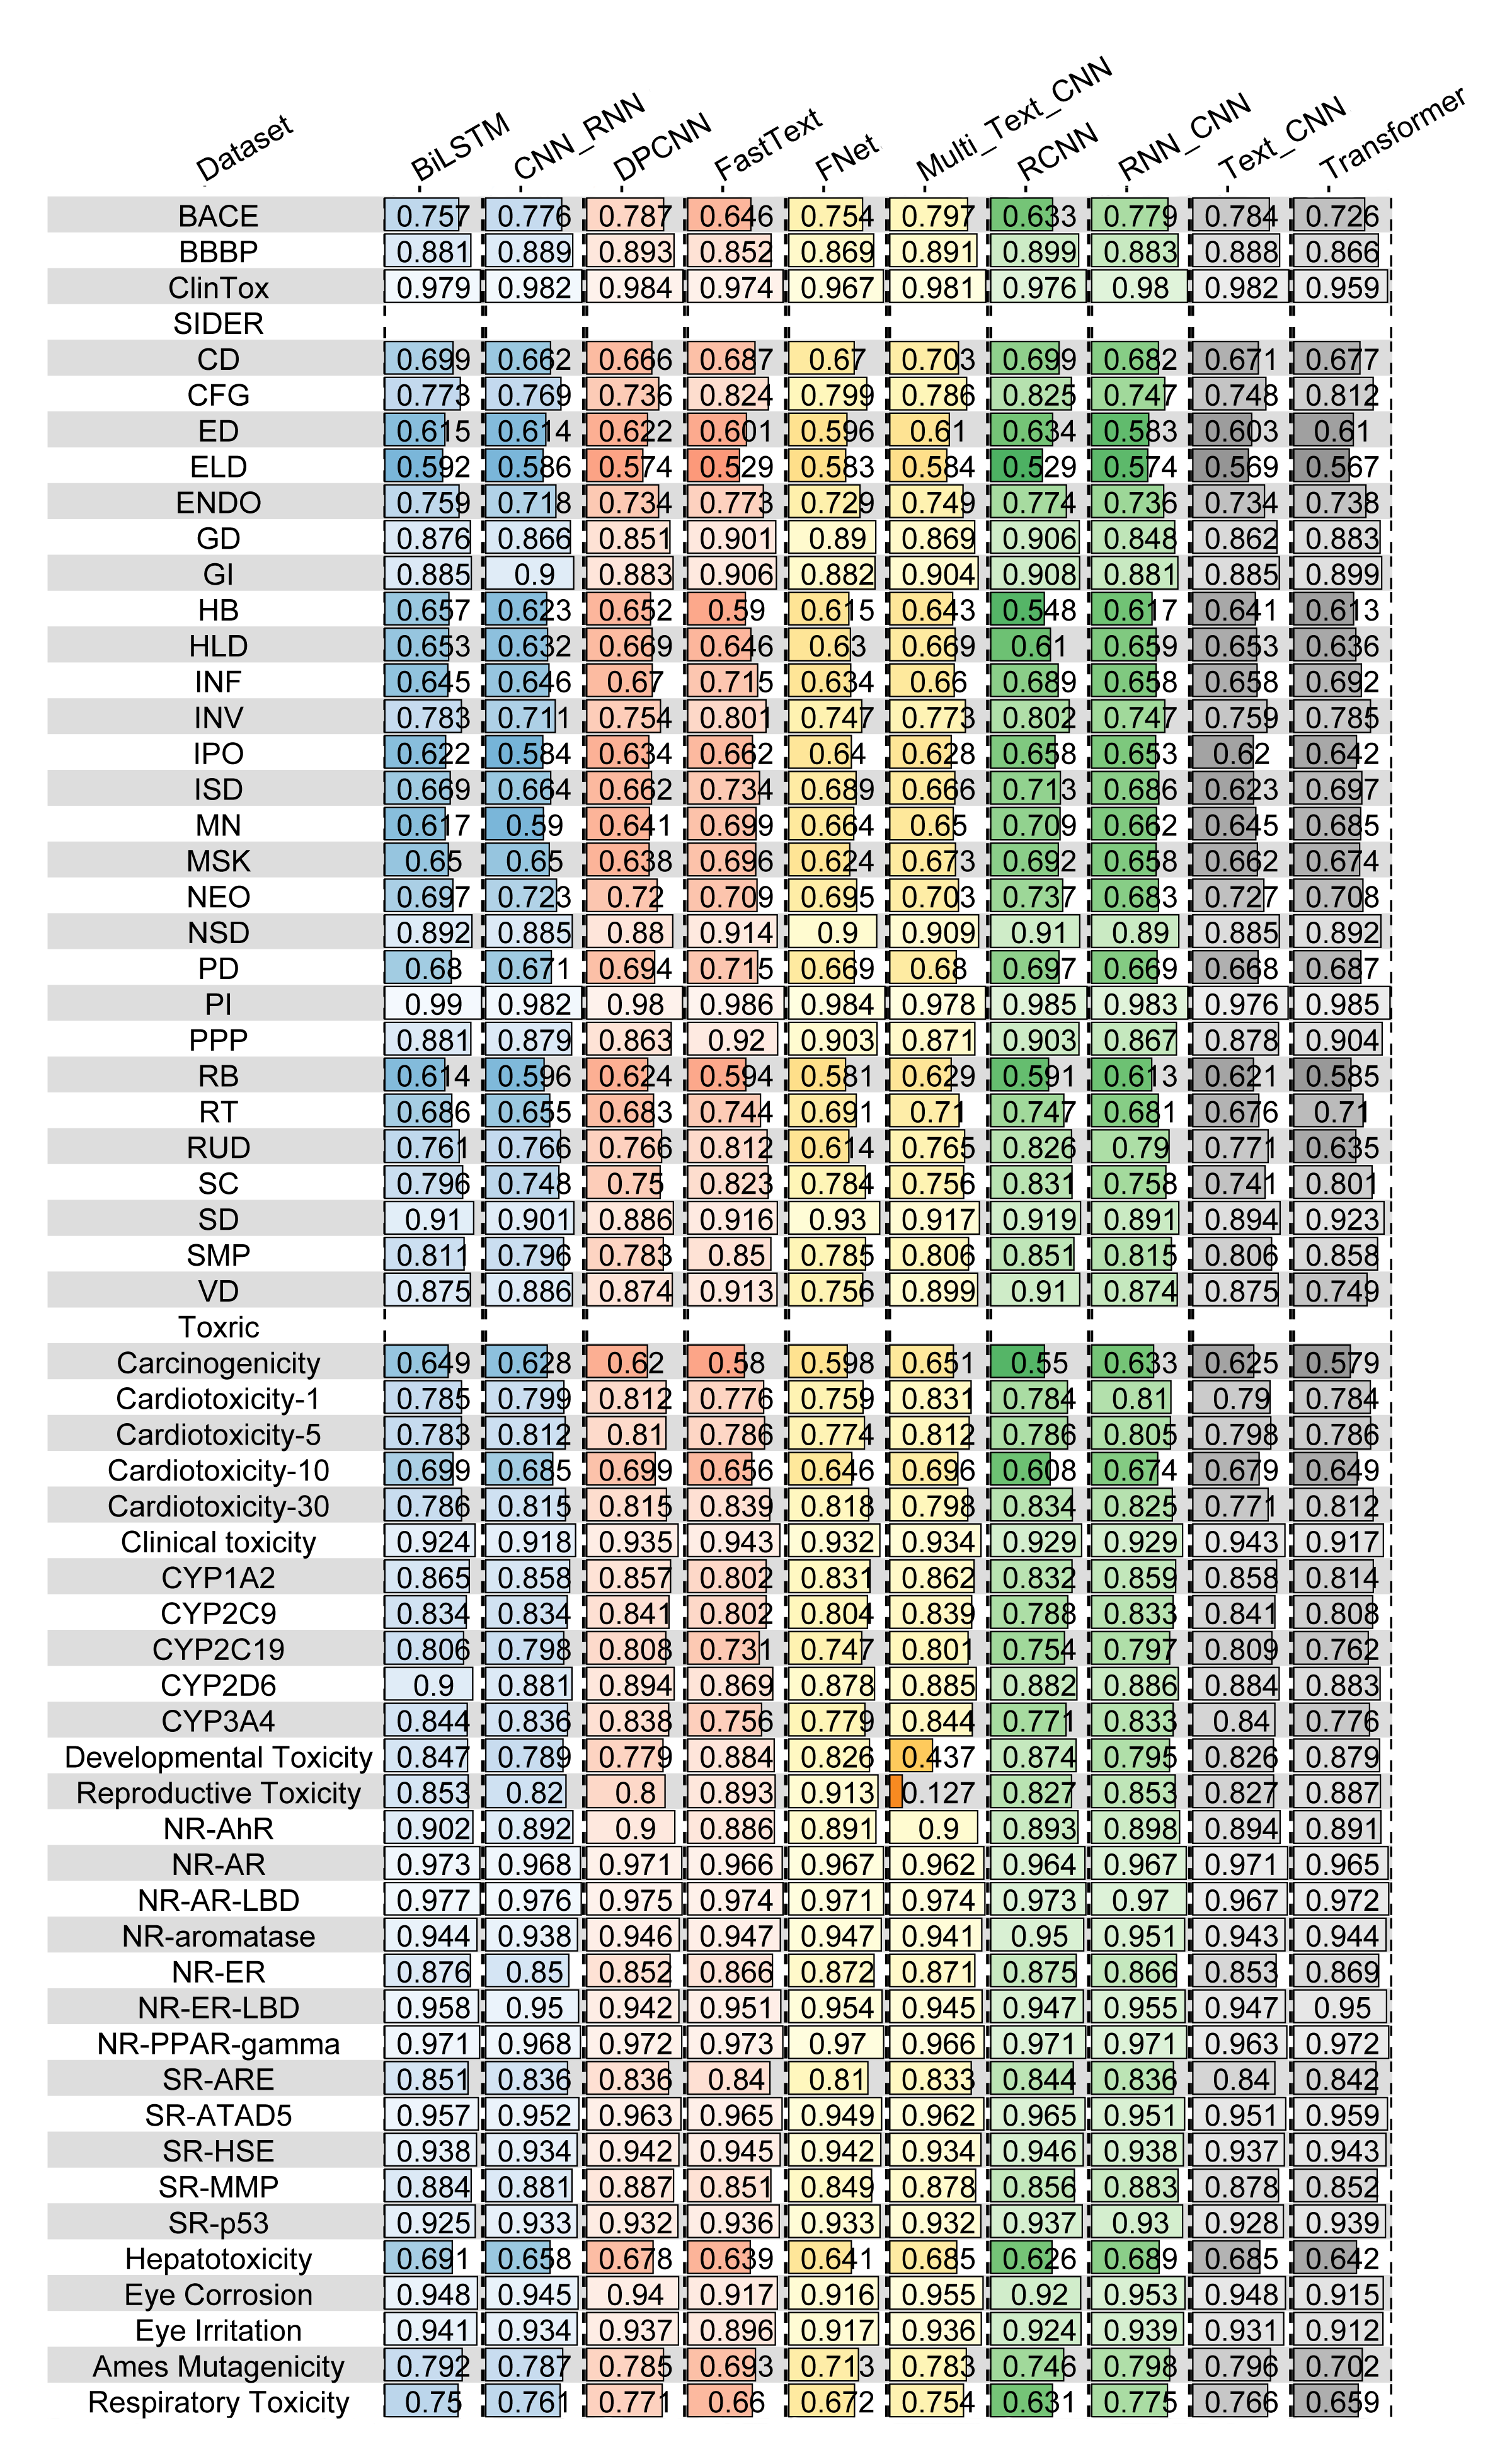
**

**Figure S2.** Prediction accuracy (ACC) of chemical language processing models across all datasets. Results are averaged over five independent testing runs for each model. Abbreviations: CD, cardiac disorders; CFG, congenital, familial, and genetic disorders; ED, eye disorders; ELD, ear and labyrinth disorders; ENDO, endocrine disorders; GD, general disorders and administration site conditions; GI, gastrointestinal disorders; HB, hepatobiliary disorders; HLD, blood and lymphatic system disorders; INF, infections and infestations; INV, investigations; IPO, injury, poisoning, and procedural complications; ISD, immune system disorders; MN, metabolism and nutrition disorders; MSK, musculoskeletal and connective tissue disorders; NEO, neoplasms; NSD, nervous system disorders; PD, psychiatric disorders; PI, product issues; PPP, pregnancy, puerperium, and perinatal conditions; RB, reproductive system and breast disorders; RT, respiratory, thoracic, and mediastinal disorders; RUD, renal and urinary disorders; SC, social circumstances; SD, skin and subcutaneous tissue disorders; SMP, surgical and medical procedures; VD, vascular disorders.


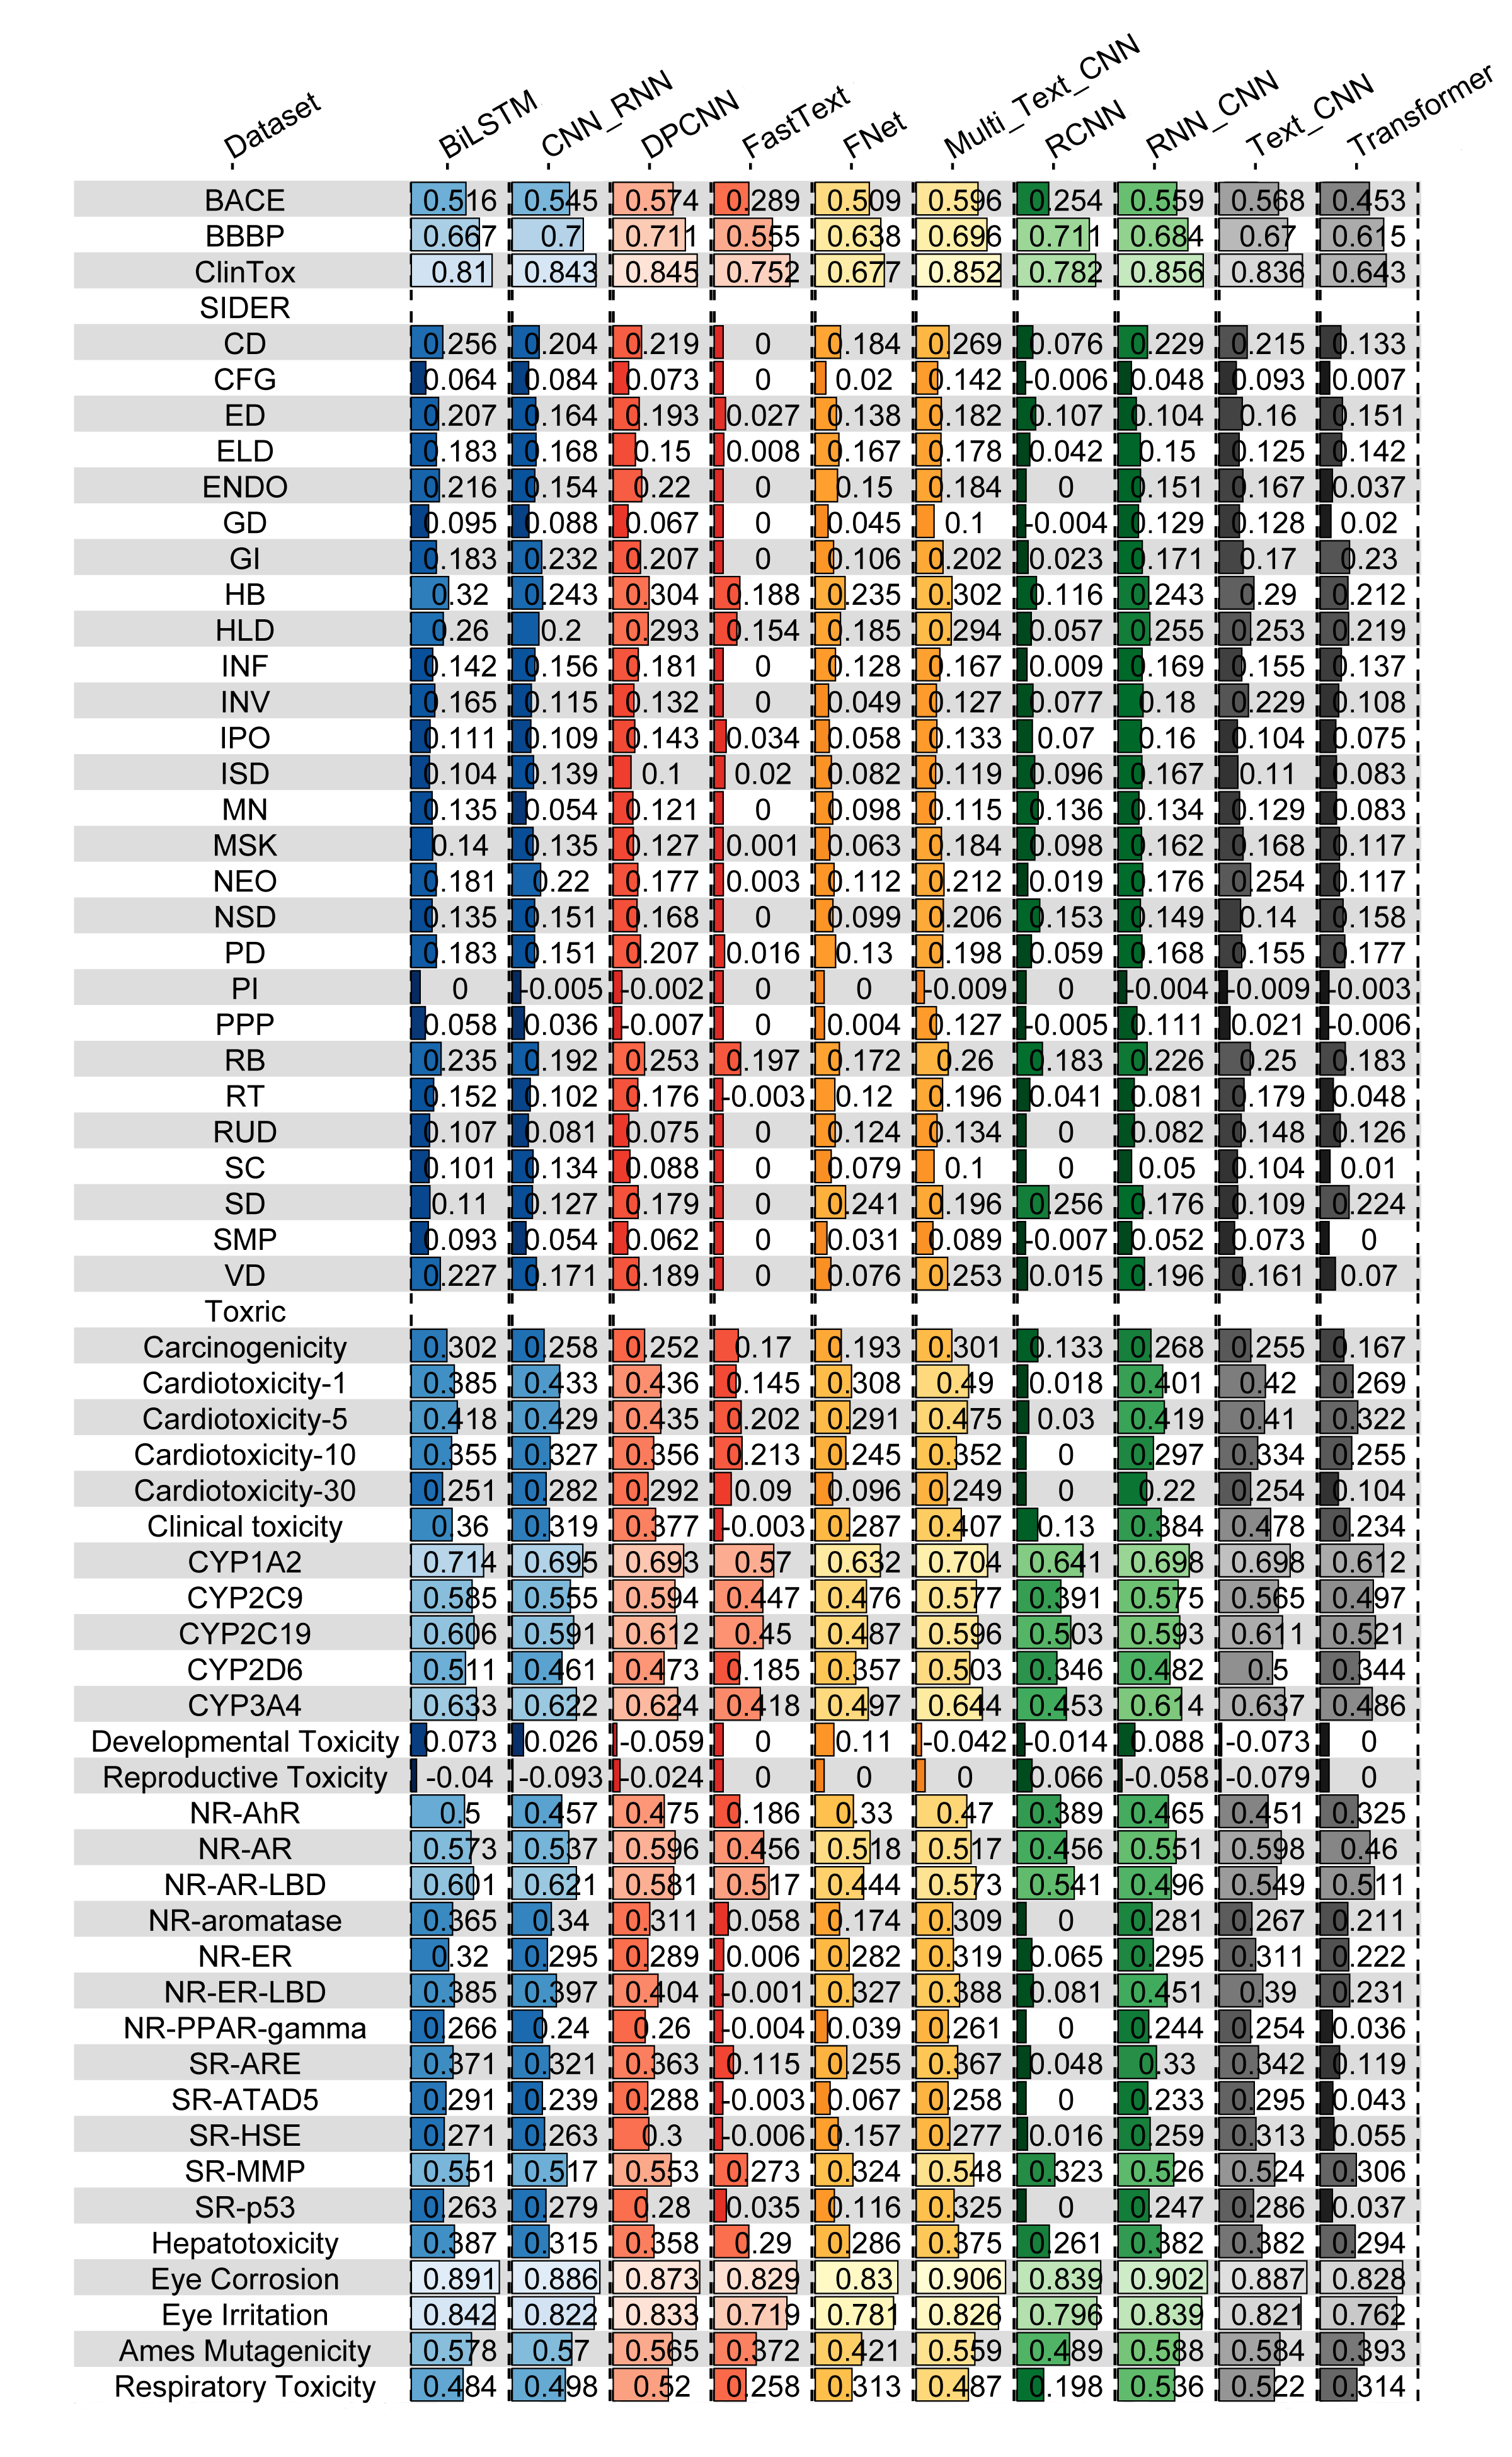


**Figure S3.** Matthews correlation coefficient (MCC) of each chemical language processing model across all datasets. Each model was evaluated through five independent runs, and the mean MCC obtained from these runs is presented. Abbreviations: CD, cardiac disorders; CFG, congenital, familial, and genetic disorders; ED, eye disorders; ELD, ear and labyrinth disorders; ENDO, endocrine disorders; GD, general disorders and administration site conditions; GI, gastrointestinal disorders; HB, hepatobiliary disorders; HLD, blood and lymphatic system disorders; INF, infections and infestations; INV, investigations; IPO, injury, poisoning, and procedural complications; ISD, immune system disorders; MN, metabolism and nutrition disorders; MSK, musculoskeletal and connective tissue disorders; NEO, neoplasms; NSD, nervous system disorders; PD, psychiatric disorders; PI, product issues; PPP, pregnancy, puerperium, and perinatal conditions; RB, reproductive system and breast disorders; RT, respiratory, thoracic, and mediastinal disorders; RUD, renal and urinary disorders; SC, social circumstances; SD, skin and subcutaneous tissue disorders; SMP, surgical and medical procedures; VD, vascular disorders.

**
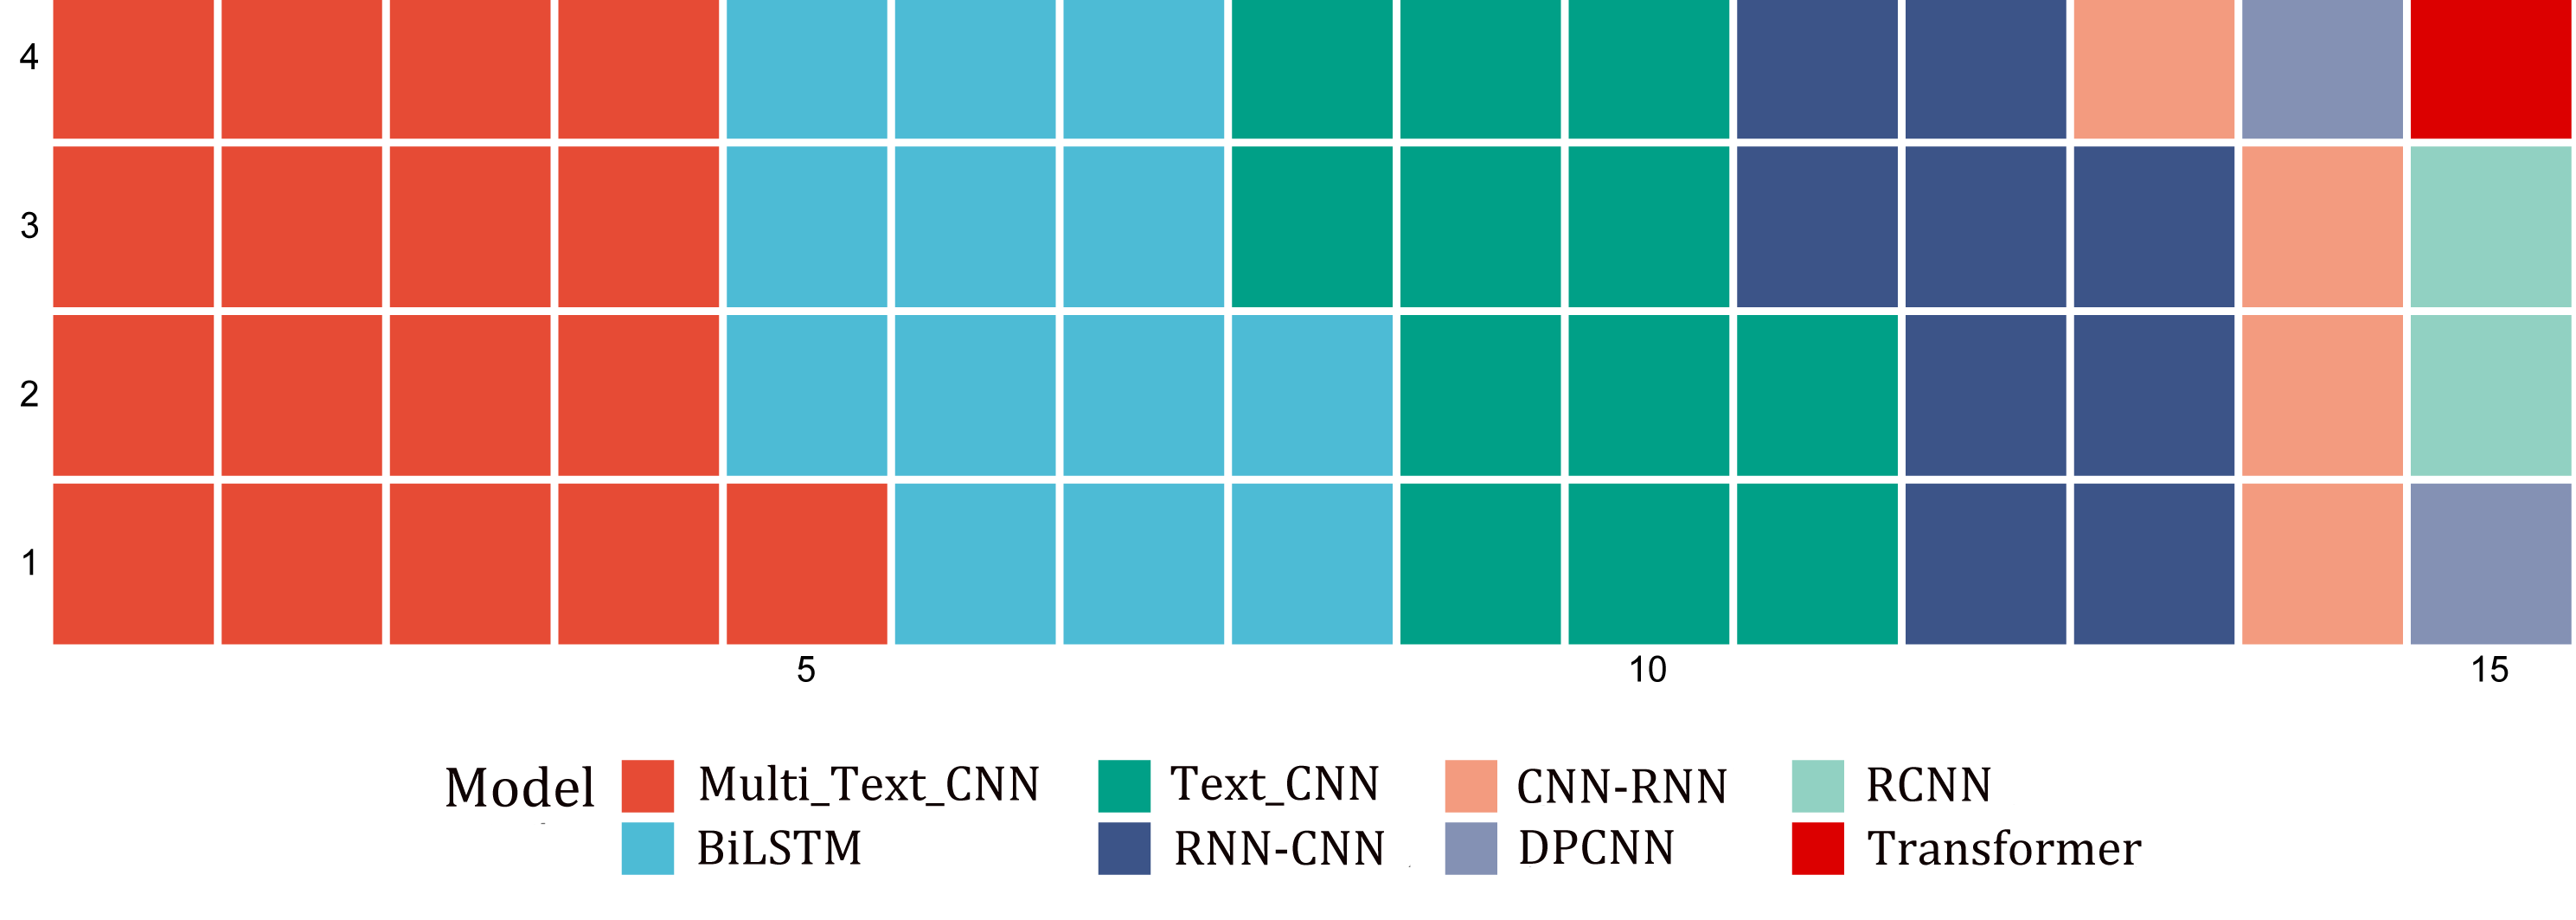
**

**Figure S4.** Distribution of top rankings across 60 datasets. For each dataset, models were ranked by MCC (averaged over five independent runs), and the number of first-place finishes was tallied for each architecture.

**
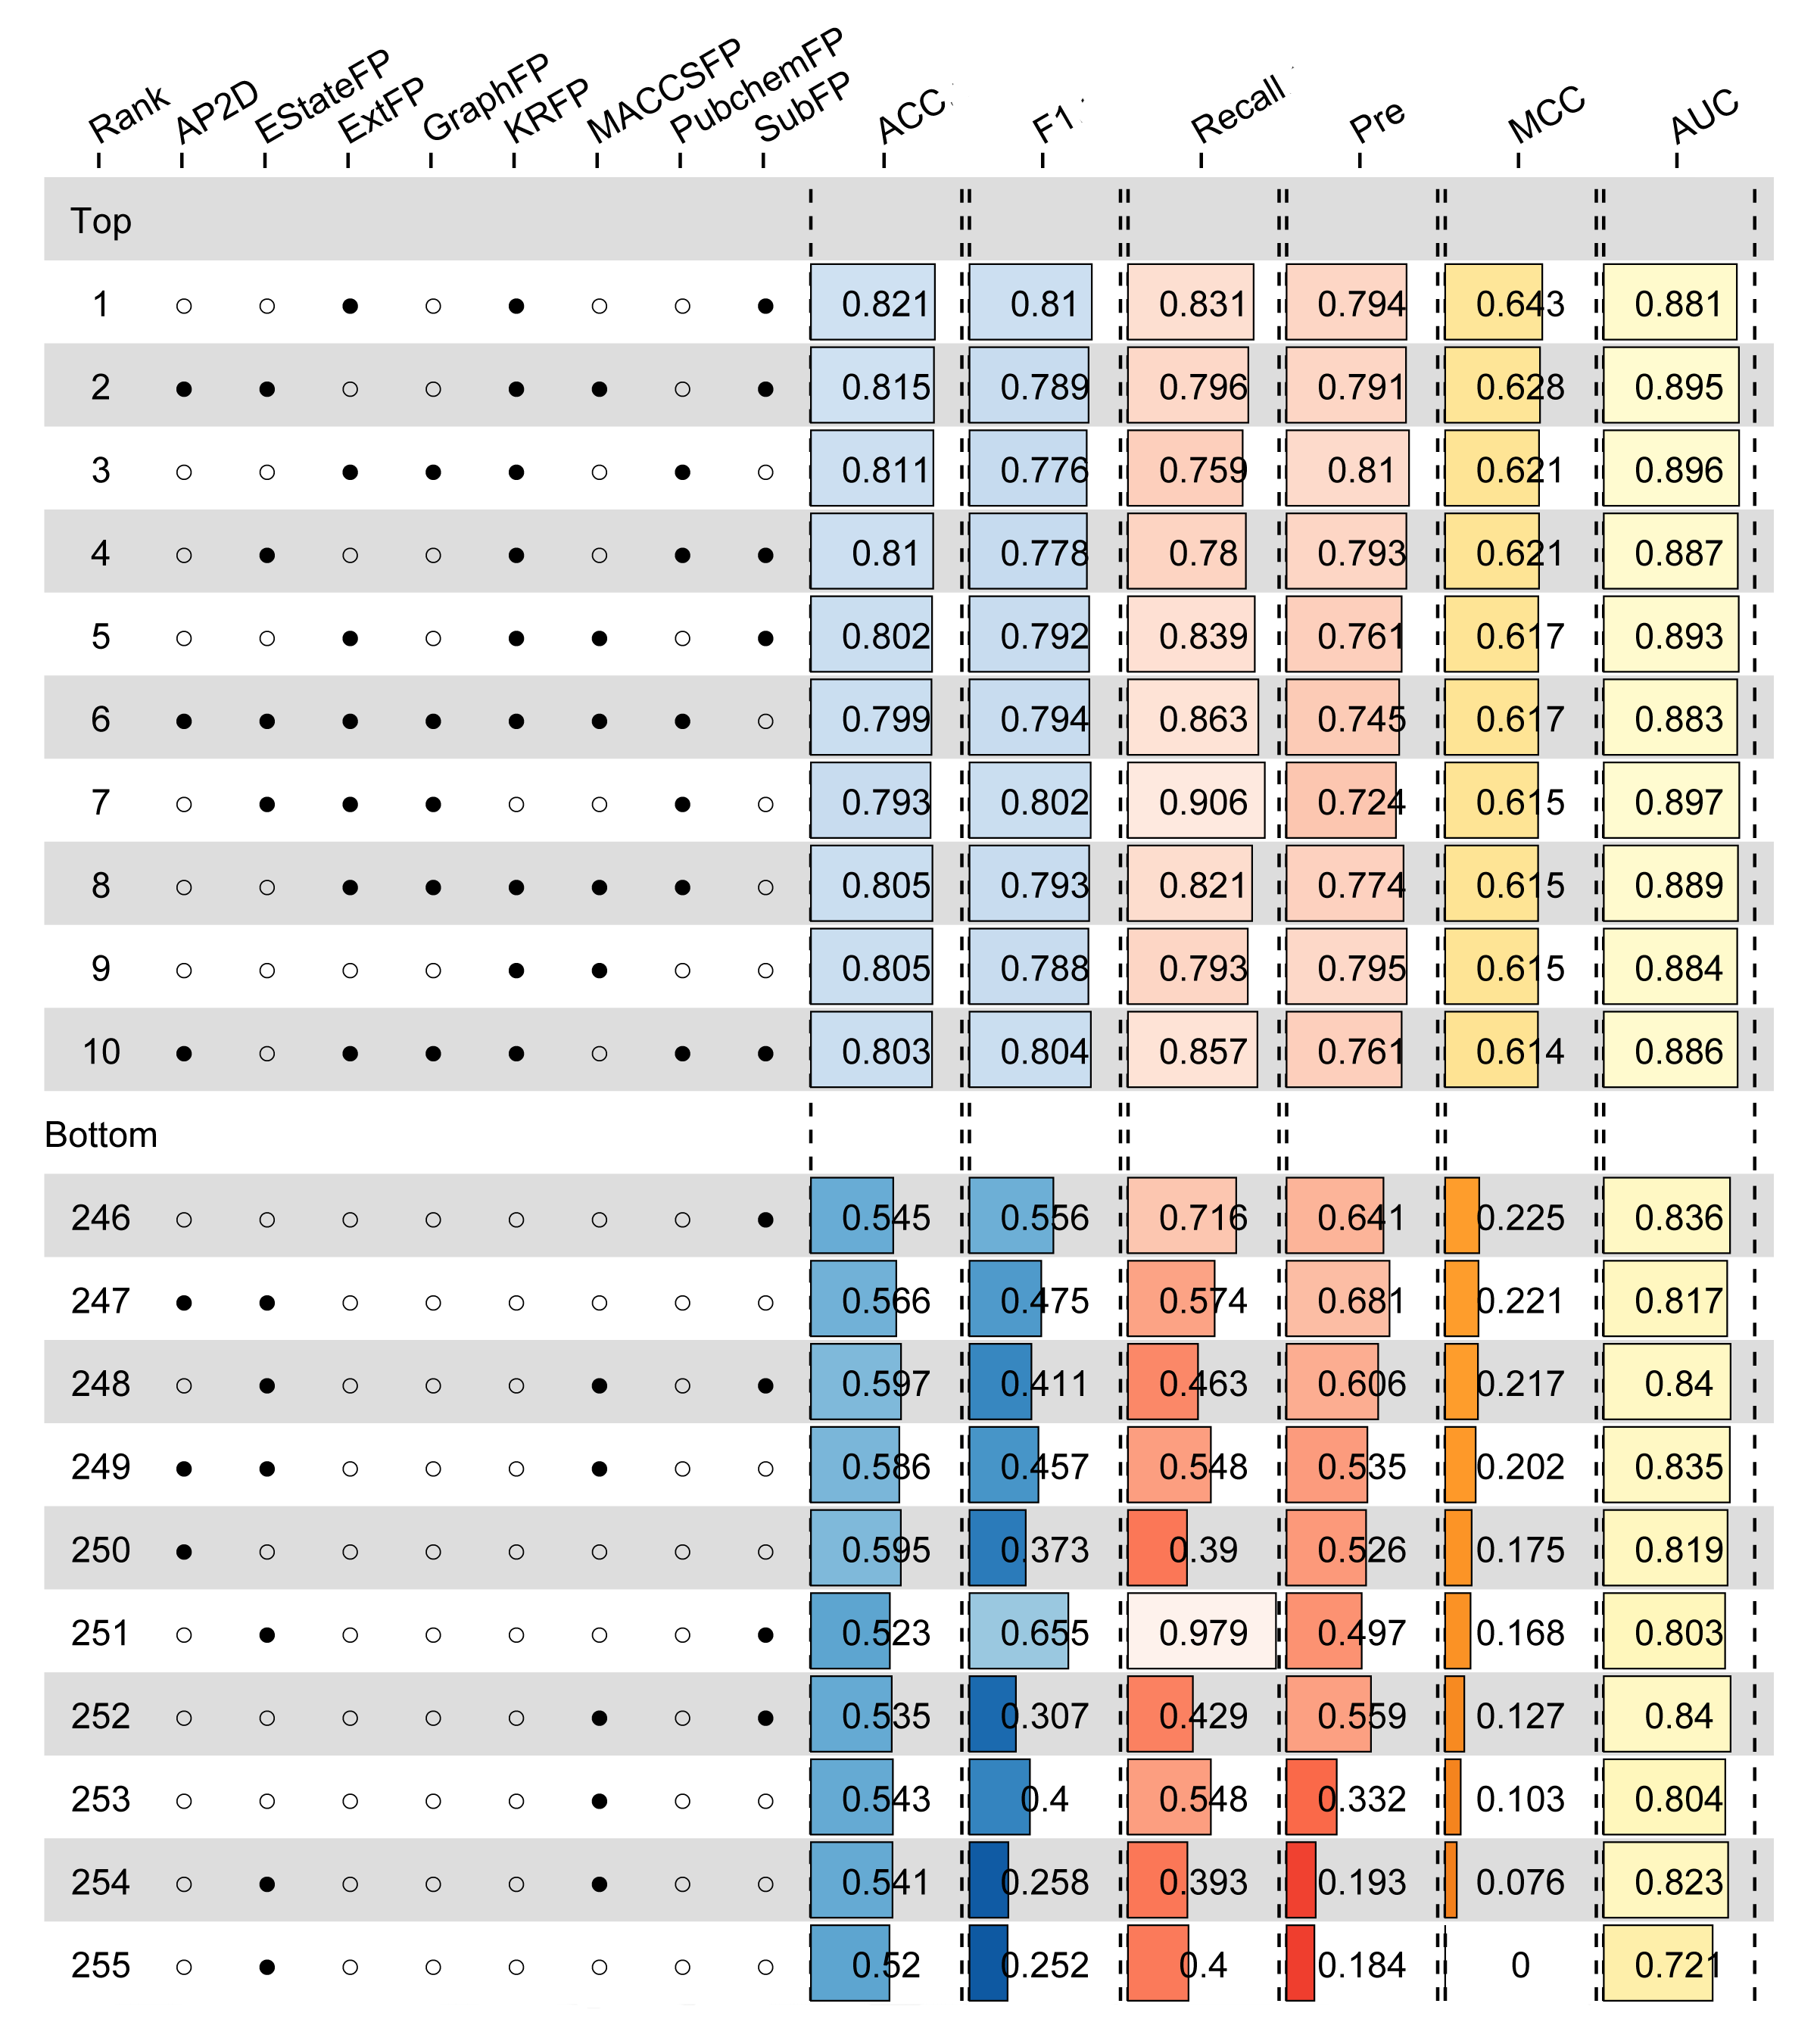
**

**Figure S5.** Top ten and bottom ten multimodal fusion combinations and their corresponding performance metrics for the BACE dataset. Each row represents a unique fusion configuration, evaluated by accuracy, F-value, recall, precision, MCC, and AUC. Models are grouped according to their input descriptor types, and ○ / ● symbols denote the exclusion or inclusion of specific fingerprint types within each combination.

**
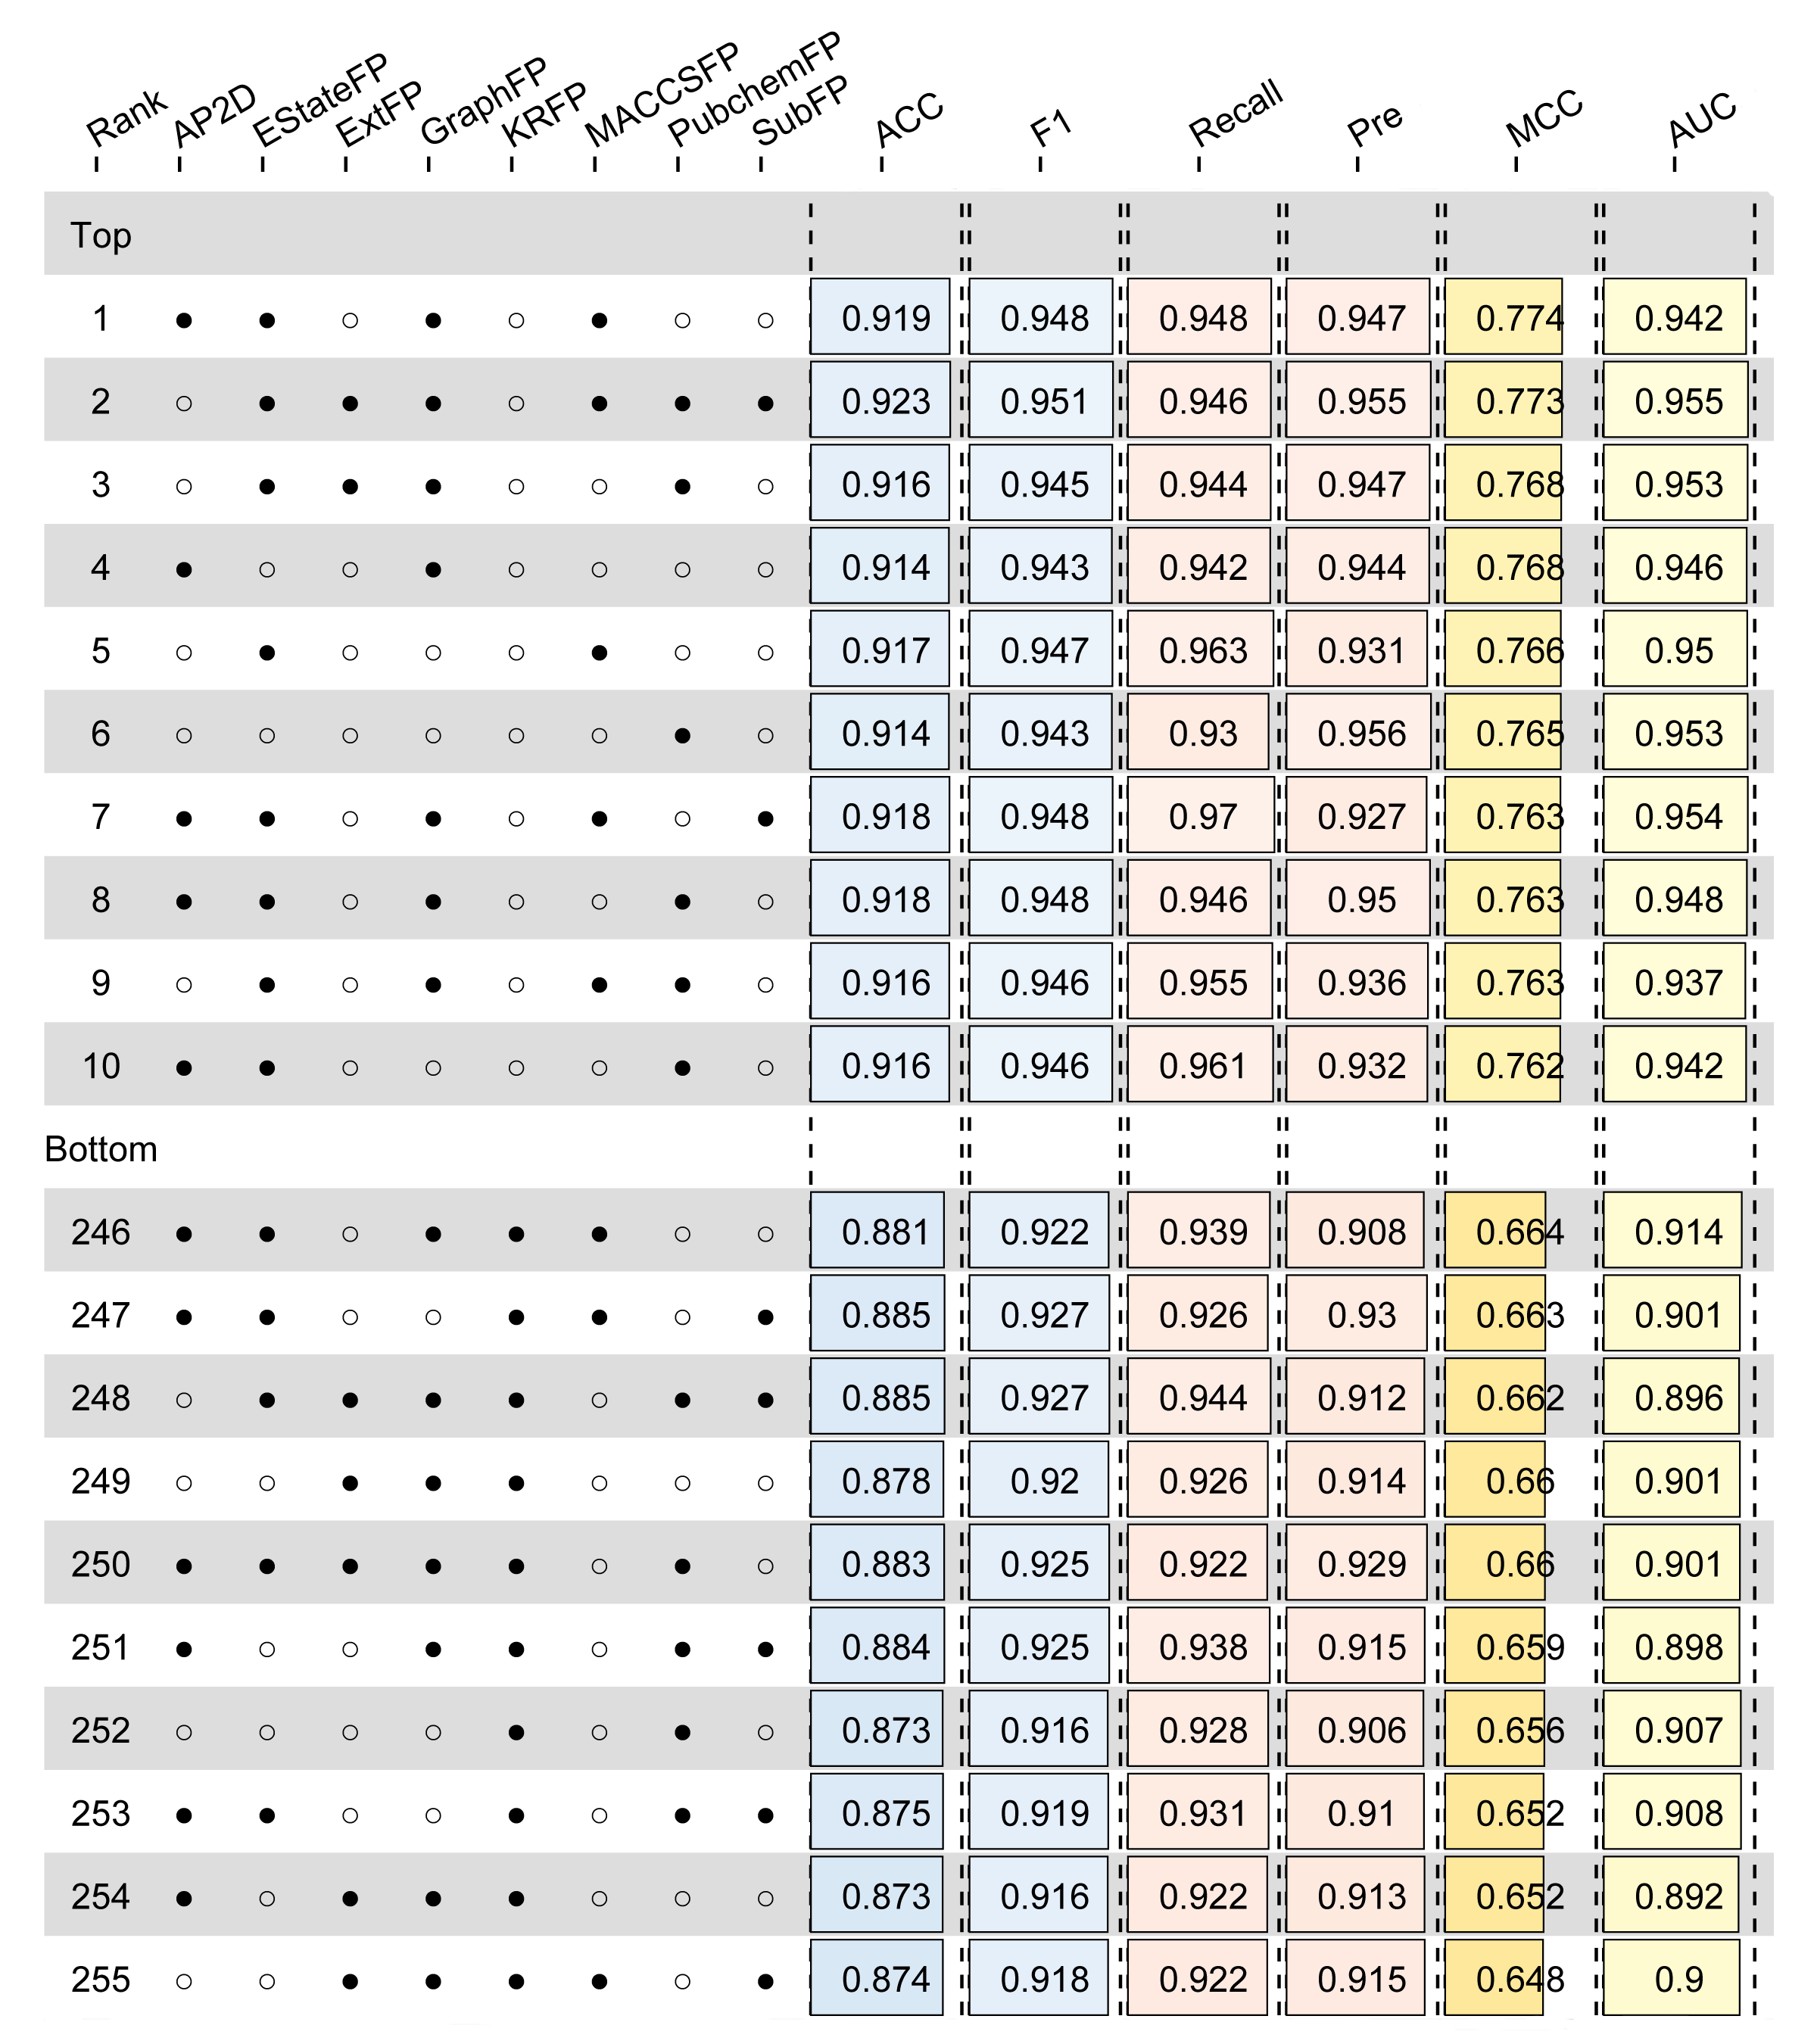
**

**Figure S6.** Top ten and bottom ten multimodal fusion combinations and their corresponding performance metrics for the BBBP dataset. Each row represents a unique fusion configuration, evaluated by accuracy, F-value, recall, precision, MCC, and AUC. Models are grouped according to their input descriptor types, and ○ / ● symbols denote the exclusion or inclusion of specific fingerprint types within each combination.

**
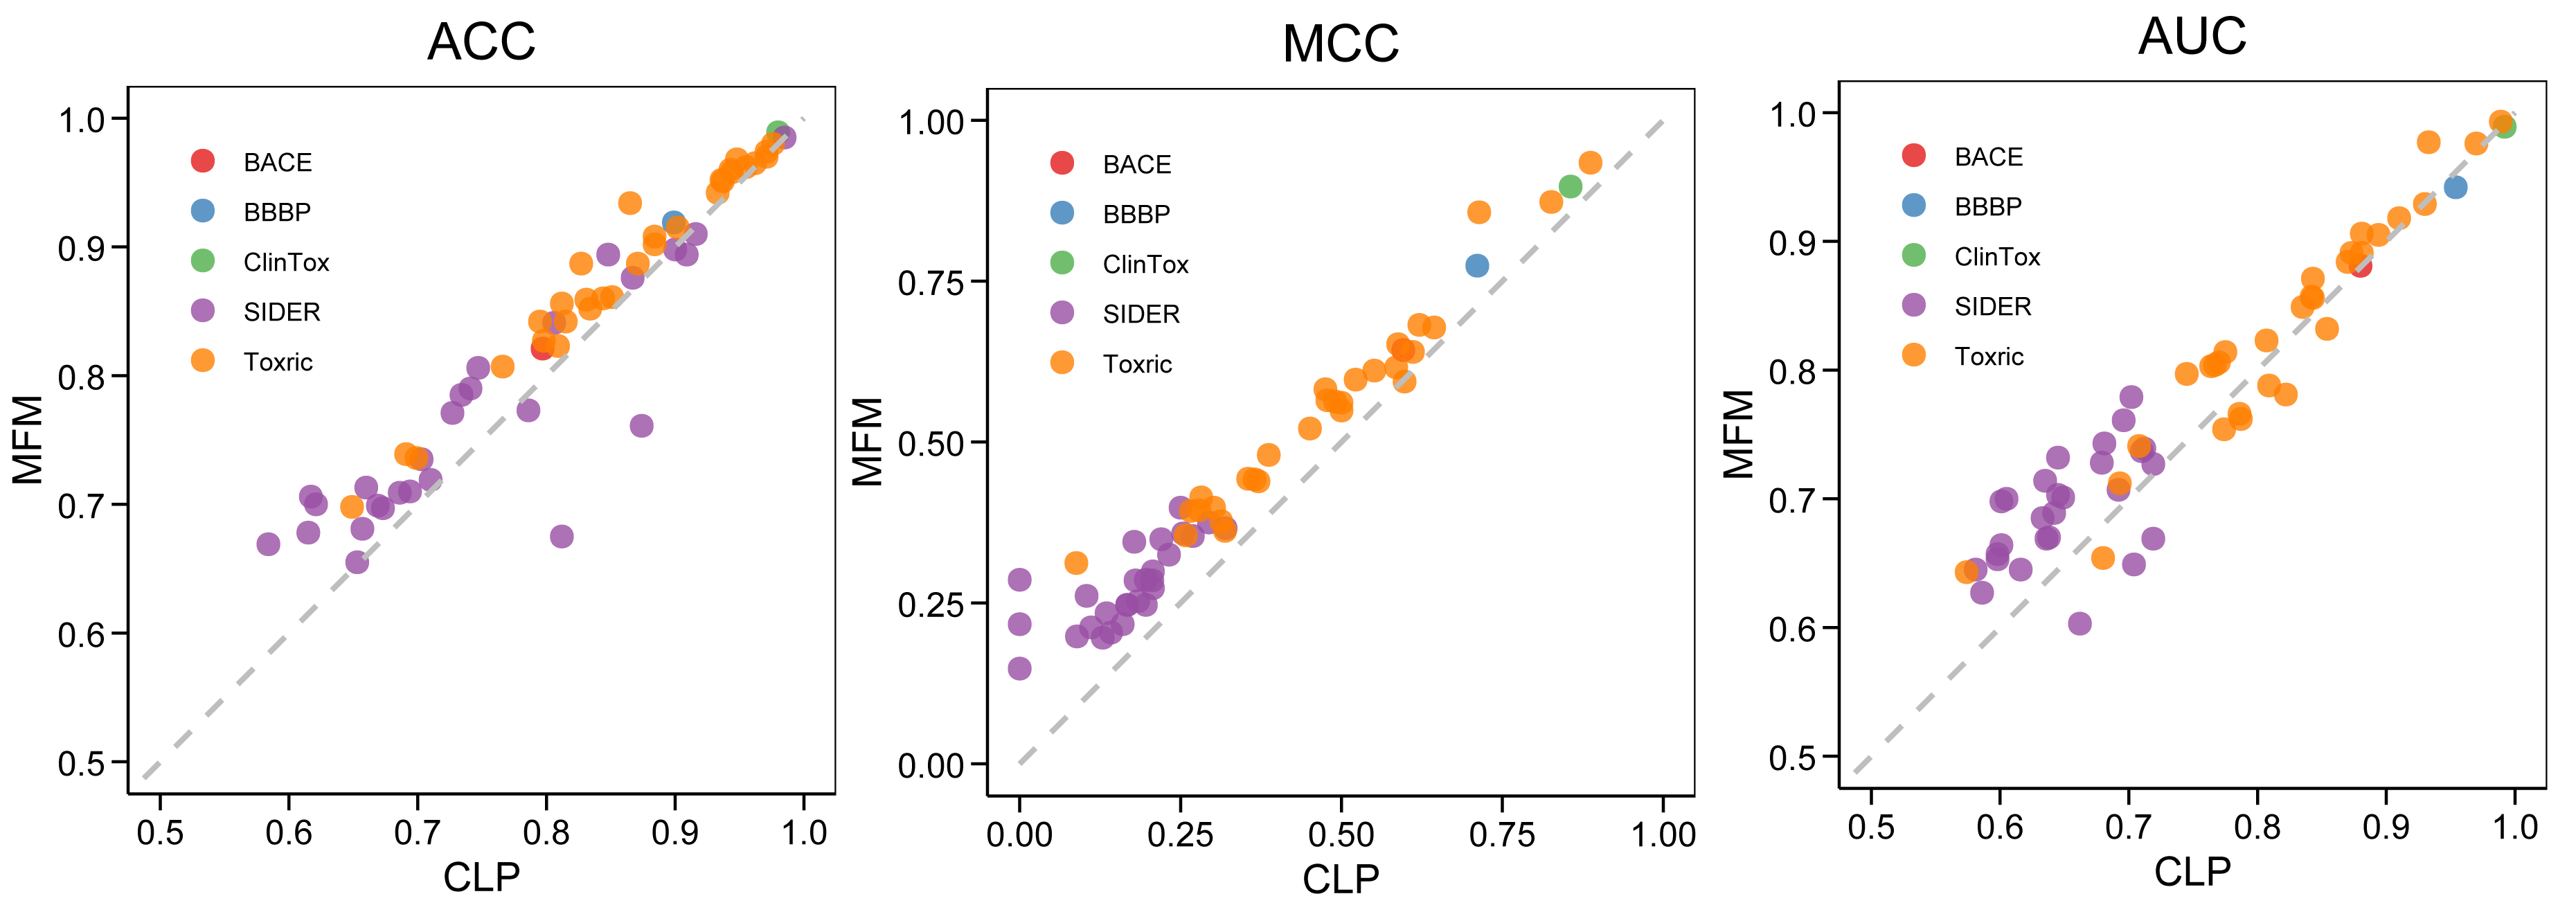
**

**Figure S7.** Comparative performance of multimodal fusion models (MFMs) versus chemical language processing models (CLPs) across 60 datasets.
